# Supplementary material for: A STING antagonist modulating the interaction with STIM1 blocks ER-to-Golgi trafficking and inhibits lupus pathology
Source: PubMed Central journal article supplement — eBioMedicine. 2021 Apr 2;66:103314. doi: 10.1016/j.ebiom.2021.103314 (PMC8047499; doi:10.1016/j.ebiom.2021.103314), 2021-04-02
Supplement: mmc4.pdf [file mmc4.pdf]

**ISD017**  
(dimer)

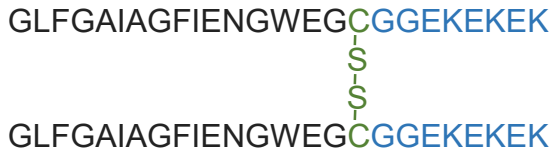

**ISD017**  
(monomer)

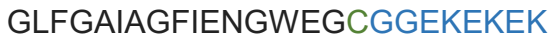

**ΔI6**

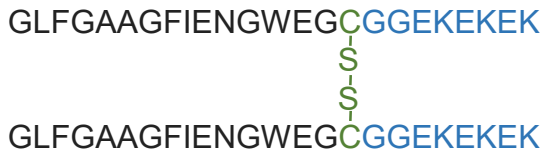

Deletion of residue no 6 (Ile)  
from both peptide chains

**ΔPolar**

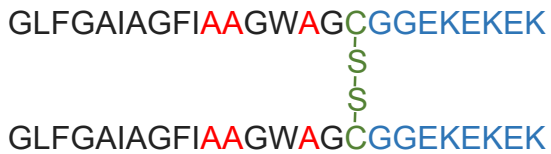

Mutations of 3 polar residues to  
Ala in both peptide chains

**ΔHydrophobic**

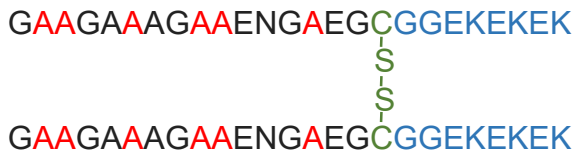

Mutations of 6 hydrophobic residues  
to Ala in both peptide chains

**ΔFlexible**

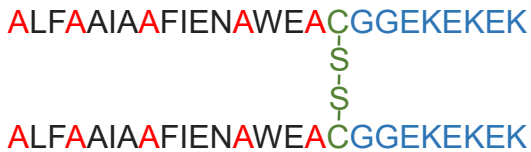

Mutations of 5 Glycine residues to  
Ala in both peptide chains
