# Supplementary figures and images for: A STING antagonist modulating the interaction with STIM1 blocks ER-to-Golgi trafficking and inhibits lupus pathology
Source: PubMed Central journal article supplement — eBioMedicine. 2021 Apr 2;66:103314. doi: 10.1016/j.ebiom.2021.103314 (PMC8047499; doi:10.1016/j.ebiom.2021.103314), 2021-04-02

# Supplemental Western blots

Fig. 1h

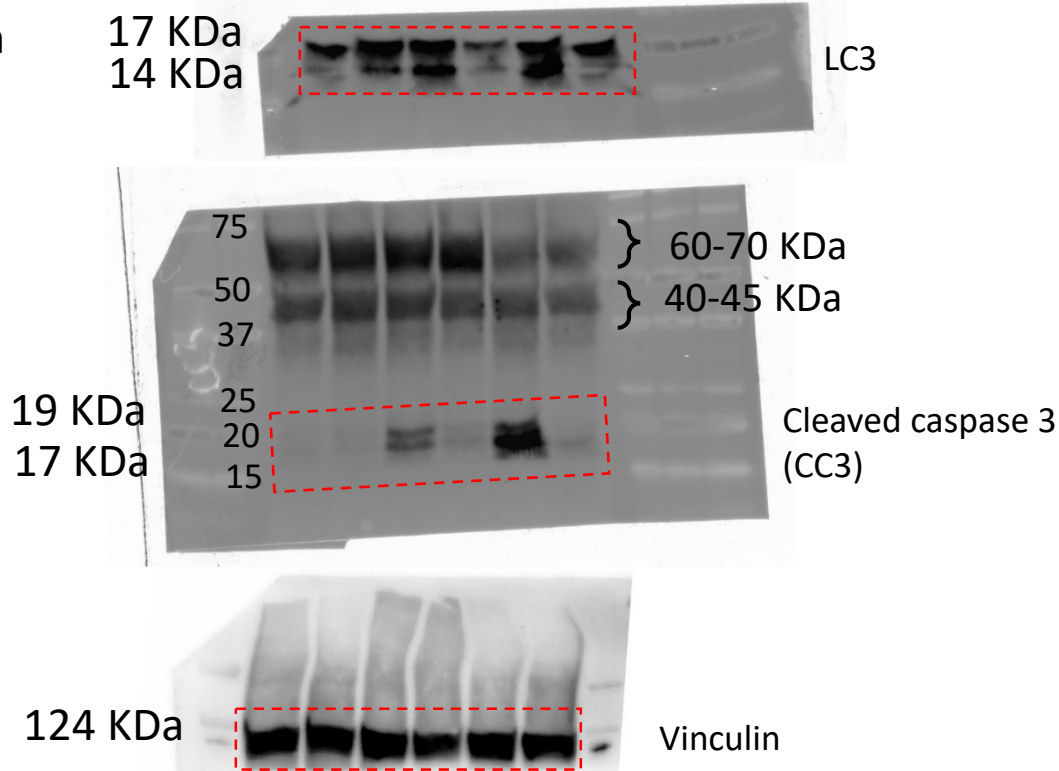

Fig. 2a

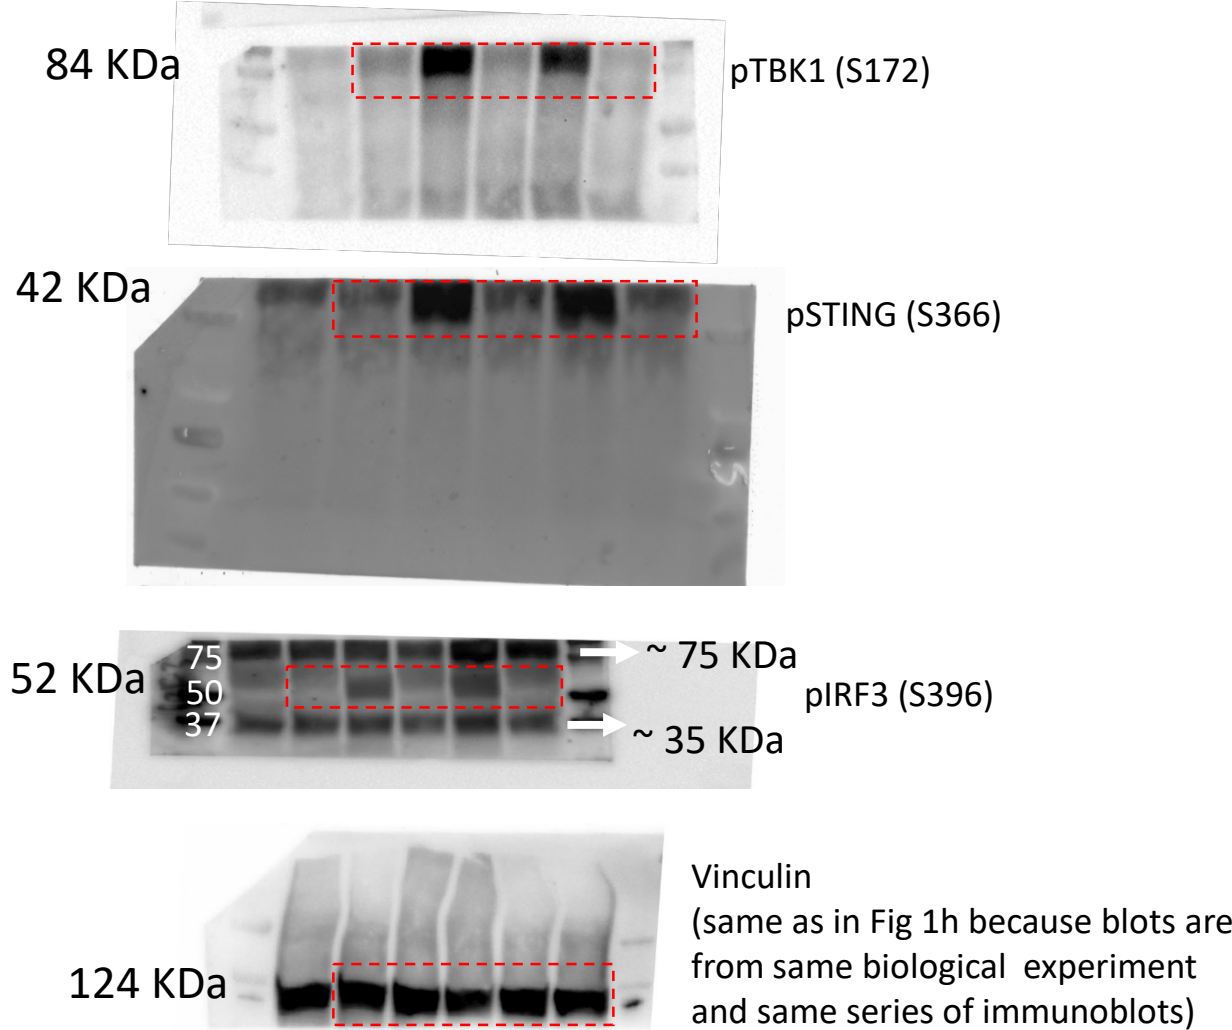

Fig. 2c

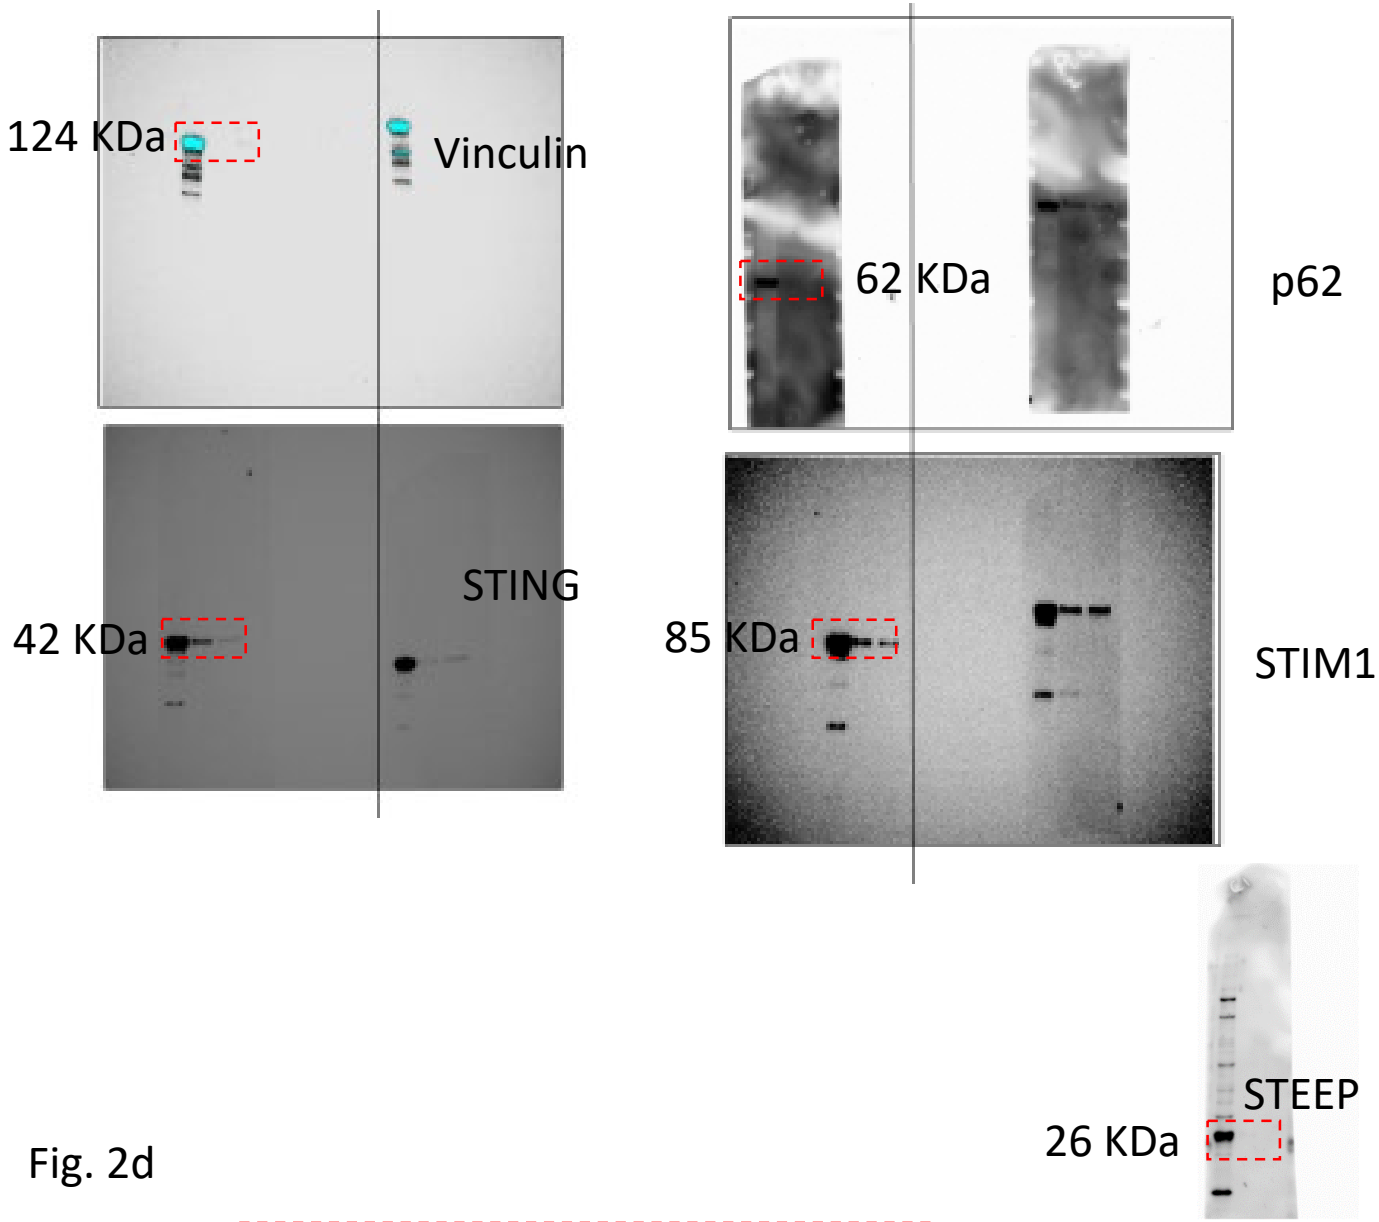

Fig. 2d

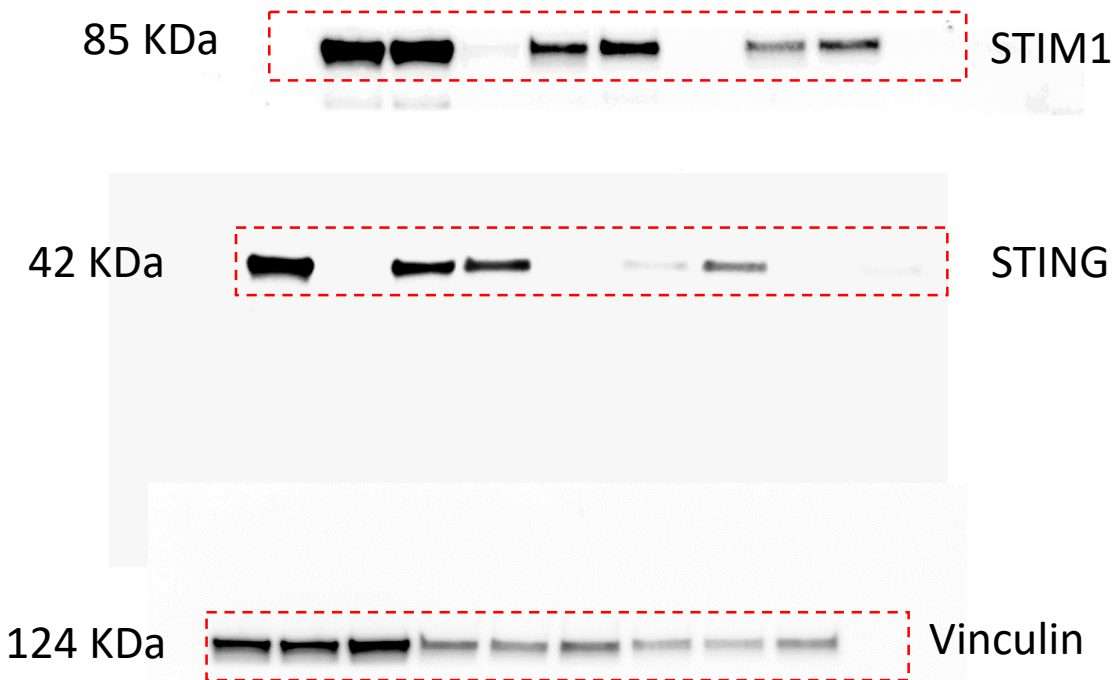

Fig. 2e

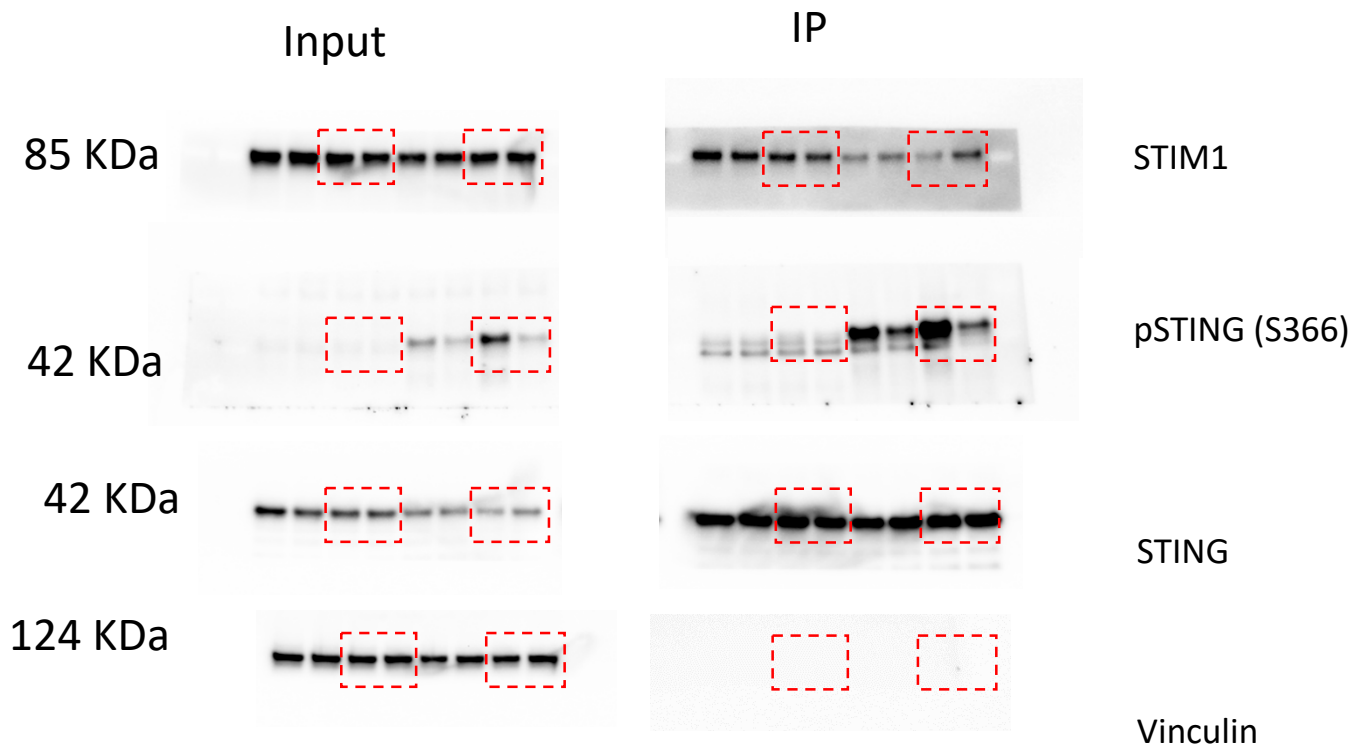

Fig. 4a

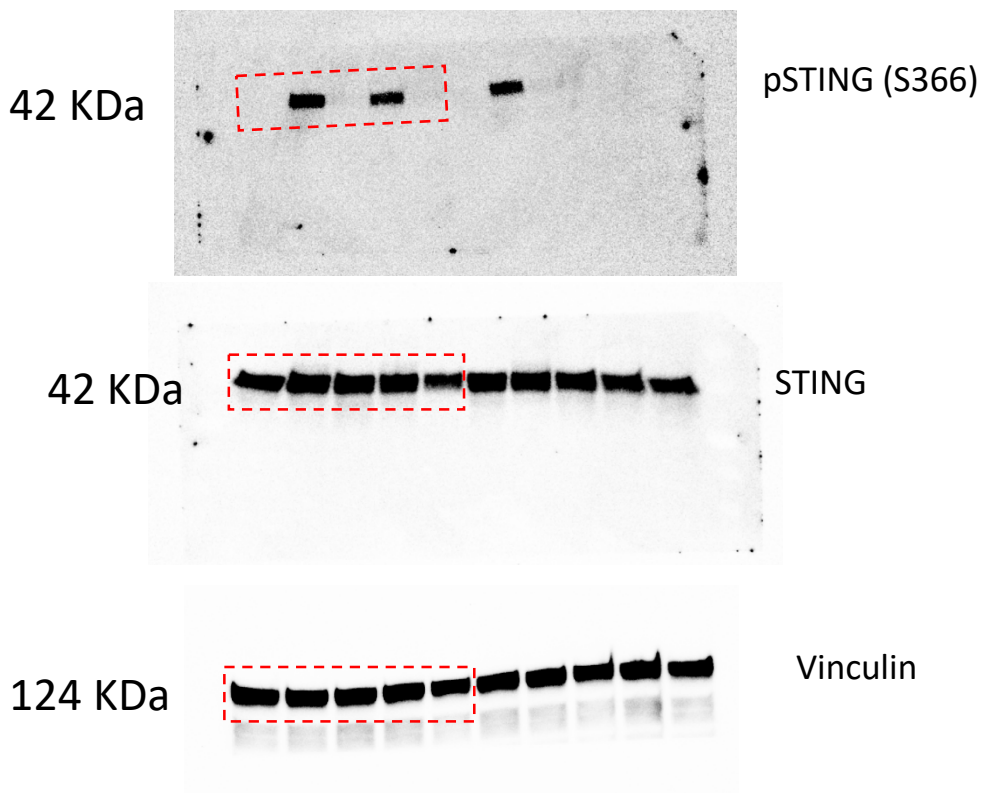

Supplement: mmc3.pdf [file mmc3.pdf]
